# Supplementary material for: Protein kinase A governs growth and virulence in Candida tropicalis
Source: PubMed Central journal article supplement — Virulence. 2018 Feb 27;9(1):331–47. doi: 10.1080/21505594.2017.1414132 (PMC5955175; doi:10.1080/21505594.2017.1414132), 2018-02-27
Supplement: kvir-09-01-1414132-s001.pdf [file kvir-09-01-1414132-s001.pdf]

## Supporting information

**Table S1. Primers used in this study.**

| Primer | Use                                         | Sequence (5' to 3')                              |
|--------|---------------------------------------------|--------------------------------------------------|
| JC17   | <i>SAT1</i> flipper                         | GGCCCCCCTCGAGGAAGTT                              |
| JC18   | <i>SAT1</i> flipper                         | GCTCTAGAAGCTAGTGGATCT                            |
| JC513  | 5'NCR of <i>TPK1</i>                        | CAGAACATTGTAATTGATGGC                            |
| JC514  | 5'NCR of <i>TPK1</i>                        | <u>AACTTCCTCGAGGGGGGGCCCTTGTTCCTGTTGTTGTTG</u>   |
| JC515  | 3'NCR of <i>TPK1</i>                        | <u>AGATCCACTAGTTCTAGAGCTCCATCAACCAACCAACCAA</u>  |
| JC516  | 3'NCR of <i>TPK1</i>                        | AGGATGTGGATTATATGGGG                             |
| JC517  | <i>TPK1</i> overlap                         | TCCGTAGCGTATCGCTAAAT                             |
| JC518  | <i>TPK1</i> overlap                         | GGTTGATTAAAAAACAAGG                              |
| JC521  | 5'NCR of <i>TPK2</i>                        | AATTGACCGTCCGCACACTA                             |
| JC522  | 5'NCR of <i>TPK2</i>                        | <u>AACTTCCTCGAGGGGGGGCCCTGGGCAAAAAAGGGAAGTT</u>  |
| JC523  | 3'NCR of <i>TPK2</i>                        | <u>AGATCCACTAGTTCTAGAGCCGAAAACGAAACAAAAGAGAG</u> |
| JC524  | 3'NCR of <i>TPK2</i>                        | AACCATCATCACCCTACCA                              |
| JC525  | <i>TPK2</i> overlap                         | CAGCACAACGACAAAACAGTGA                           |
| JC526  | <i>TPK2</i> overlap                         | GAGGATAAAGAAGGTCAAAGG                            |
| JC545  | 3'NCR of 2 <sup>nd</sup> <i>TPK2</i> allele | <u>AACTTCCTCGAGGGGGGGCCGCTTTTTTAAAAAGATTGGCA</u> |
| JC546  | 5'NCR of 2 <sup>nd</sup> <i>TPK2</i> allele | <u>AGATCCACTAGTTCTAGAGCAATACTTCCTCGACTTTTAGA</u> |
| JC555  | 3'NCR of 2 <sup>nd</sup> <i>TPK1</i> allele | <u>AACTTCCTCGAGGGGGGGCCCTCCTTTTTCCATAGATGTCA</u> |
| JC556  | 5'NCR of 2 <sup>nd</sup> <i>TPK1</i> allele | <u>AGATCCACTAGTTCTAGAGCCAATTTGAAGATTTTAAATCT</u> |
| JC758  | 5'NCR of <i>TPK2</i>                        | AAAGGTACCTTAGGCATCACGTGTTGCT                     |
| JC759  | 5'NCR of <i>TPK2</i>                        | AAAGGGCCCCGAAAATGGGCAAAAAAGGGA                   |
| JC760  | 3'NCR of <i>TPK2</i>                        | AAACCGCGGGCGAAAACGAAACAAAGAGAGA                  |
| JC761  | 3'NCR of <i>TPK2</i>                        | AAAGAGCTCTCCAGGCACAACCTTTCCTTA                   |
| JC782  | 5'NCR of <i>TPK2</i>                        | AAAGGTACCAATTGACCGTCCGCACACTA                    |
| JC783  | 5'NCR of <i>TPK2</i>                        | AAAGGGCCCTGGGCAAAAAAGGGAAGTT                     |
| JC784  | <i>TPK2</i> ORF                             | AAACCGCGGATGCCAAATCTTTTTAAAAAAG                  |
| JC785  | <i>TPK2</i> ORF                             | AAAGAGCTCCTAAAAGTCGAGGAAGTATTG                   |
| JC998  | 5'NCR and ORF of <i>TPK2</i>                | AAAGGTACCGTGGTGGTAGTATTAGGCATC                   |
| JC999  | 5'NCR and ORF of <i>TPK2</i>                | AAAGGGCCCCTAAAAGTCGAGGAAGTATTG                   |
| JC1004 | 3'NCR of <i>TPK1</i>                        | AAACCGCGGTCCATCAACCAACCAACCAA                    |
| JC1006 | 5'NCR and ORF of <i>TPK1</i>                | AAAGGGCCCTCATCATCGGTAGTAAAA                      |
| JC1007 | 5'NCR and ORF of <i>TPK1</i>                | AAACTCGAGTTAAAAATCTTCAAATTGATC                   |
| JC1023 | 3'NCR of <i>TPK1</i>                        | AAAGAGCTC TCGTCGACTTTATTATTCTGGTTCA              |
| JC1150 | <i>TPK2</i> -F for qPCR                     | AATCCCGTGGCCAAATTTTATG                           |
| JC1151 | <i>TPK2</i> -R for qPCR                     | TCCATGTGACAGTGCTGACCTC                           |
| JC1154 | <i>ALS3</i> -F for qPCR                     | TGGCATTTAACGTTGGTGGTTC                           |
| JC1155 | <i>ALS3</i> -R for qPCR                     | TGCAGCAAAATAGGCTTGGGTA                           |
| JC1156 | <i>HWP1</i> -F for qPCR                     | AGTGACTGAAGGGCACATTCCA                           |
| JC1157 | <i>HWP1</i> -R for qPCR                     | TGCAAGACCAACAATAGCAGCA                           |
| JC1158 | <i>EFG1</i> -F for qPCR                     | AGGAATTGCAAACCCAAGTGCT                           |
| JC1159 | <i>EFG1</i> -R for qPCR                     | CTTGCTGGTTTGGTTGTCCTTG                           |
| JC1160 | <i>NDT80</i> -F for qPCR                    | TTGCATCAACAAATGCCACATC                           |
| JC1161 | <i>NDT80</i> -R for qPCR                    | TCTTGGGTCAAATGAGGGGATT                           |
| JC1162 | <i>TEC1</i> -F for qPCR                     | CACCTCCTCCAACCTCAAGCTCA                          |
| JC1163 | <i>TEC1</i> -R for qPCR                     | ATTGGTATTTCGGAACCGTTGCT                          |
| JC1164 | <i>BCR1</i> -F for qPCR                     | ACATCCACCACAACAGCCATCT                           |
| JC1165 | <i>BCR1</i> -R for qPCR                     | TGGTAATGGAGGCAATGGTTTG                           |
| JC1193 | <i>ACT1</i> -F for qPCR                     | CCAGCCGATTTAGGTTTGAAG                            |
| JC1194 | <i>ACT1</i> -R for qPCR                     | CGTTCAGCAATACCTGGGAACA                           |
| JC1199 | <i>TPK1</i> -F for qPCR                     | GCCAACAGACAACATCAACAGAAT                         |
| JC1120 | <i>TPK1</i> -R for qPCR                     | TGGACGTGCTATTTTCATTGTCC                          |
| JC1203 | <i>RIM101</i> -F for qPCR                   | CAACGGTCTTCAAACCTGCTGCT                          |
| JC1204 | <i>RIM101</i> -R for qPCR                   | TCTTCTTCTCGTCGCTCACTGC                           |
| JC1205 | <i>BRG1</i> -F for qPCR                     | TCCAATCATGCATCCTCAACAA                           |
| JC1206 | <i>BRG1</i> -R for qPCR                     | CTGGTGTGGGTTTTGTGGGTA                            |
| JC1207 | <i>ROB1</i> -F for qPCR                     | ACCTTTGGCTGCACCATTACCT                           |
| JC1208 | <i>ROB1</i> -R for qPCR                     | TTGCAGCAGTGGTGGTAGTTGA                           |
| JC1209 | <i>FLO8</i> -F for qPCR                     | CCAATAAACCATCCCCAGCAAT                           |

|        |                         |                               |
|--------|-------------------------|-------------------------------|
| JC1210 | <i>FLO8</i> -R for qPCR | <u>TGCCAGCACTTGTAGGTTGTGA</u> |
| JC1211 | <i>GAL4</i> -F for qPCR | <u>AAACTTGCATCCTGCGAGAGTG</u> |
| JC1212 | <i>GAL4</i> -R for qPCR | <u>AGGGGTTTGATTGGATTGACG</u>  |

Sequences complementary to the *SAT1* flipper are underlined.

**Table S2. Plasmids used in this study**

| Plasmid | Relevant insert                                      | Enzymes used  | Reference |
|---------|------------------------------------------------------|---------------|-----------|
| pSFS2A  |                                                      |               | 1         |
| pYSJ6   | 3' NCR of 1 <sup>st</sup> <i>TPK2</i> allele         | SacII, SacI   | pSFS2A    |
| pYSJ10  | 5' NCR of 1 <sup>st</sup> <i>TPK2</i> allele         | KpnI, ApaI    | pYSJ6     |
| pYEN2   | 5' NCR of 1 <sup>st</sup> <i>TPK2</i> allele and ORF | KpnI, ApaI    | pYSJ6     |
| pYSJ25  | 3' NCR of 2 <sup>nd</sup> <i>TPK2</i> allele         | SacII, SacI   | pSFS2A    |
| pYSJ29  | 5' NCR of 2 <sup>nd</sup> <i>TPK2</i> allele         | KpnI, HindIII | pYSJ25    |
| pYEN37  | 3' NCR of <i>TPK1</i> allele                         | SacII, SacI   | pSFS2A    |
| pYSJ122 | 5' NCR and ORF of <i>TPK1</i> allele                 | ApaI, XhoI    | pYEN37    |

## Reference

1. Reuß O, Vik A, Kolter R, Morschhäuser J. The *SAT1* flipper, an optimized tool for gene disruption in *Candida albicans*. *Gene* 2004; 341:119-27.

Figure S1

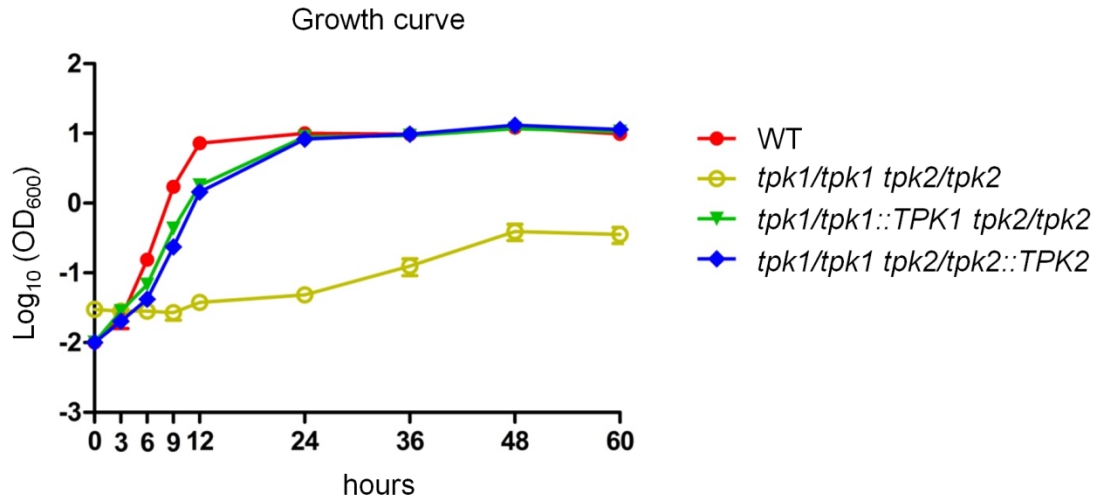

**Figure S1. Reintroducing *TPK1* or *TPK2* gene complements the growth defects of the *tpk1/tpk1 tpk2/tpk2* mutant.**

Growth curves of the indicated *C. tropicalis* strains. Cells were grown overnight in YPD at 30°C, washed twice with dH<sub>2</sub>O, diluted to 0.01 OD<sub>600</sub>, (except for the *tpk1/tpk1 tpk2/tpk2* mutant (YEN1), which was diluted to 0.03 OD<sub>600</sub> with fresh YPD medium), and incubated at 30°C for 60 h with shaking at 200 rpm. The OD<sub>600</sub> of strains was measured via microplate spectrophotometer at the indicated time points. The experiments were performed in triplicate and the values represent the mean ± standard error of the mean (SEM).

Figure S2

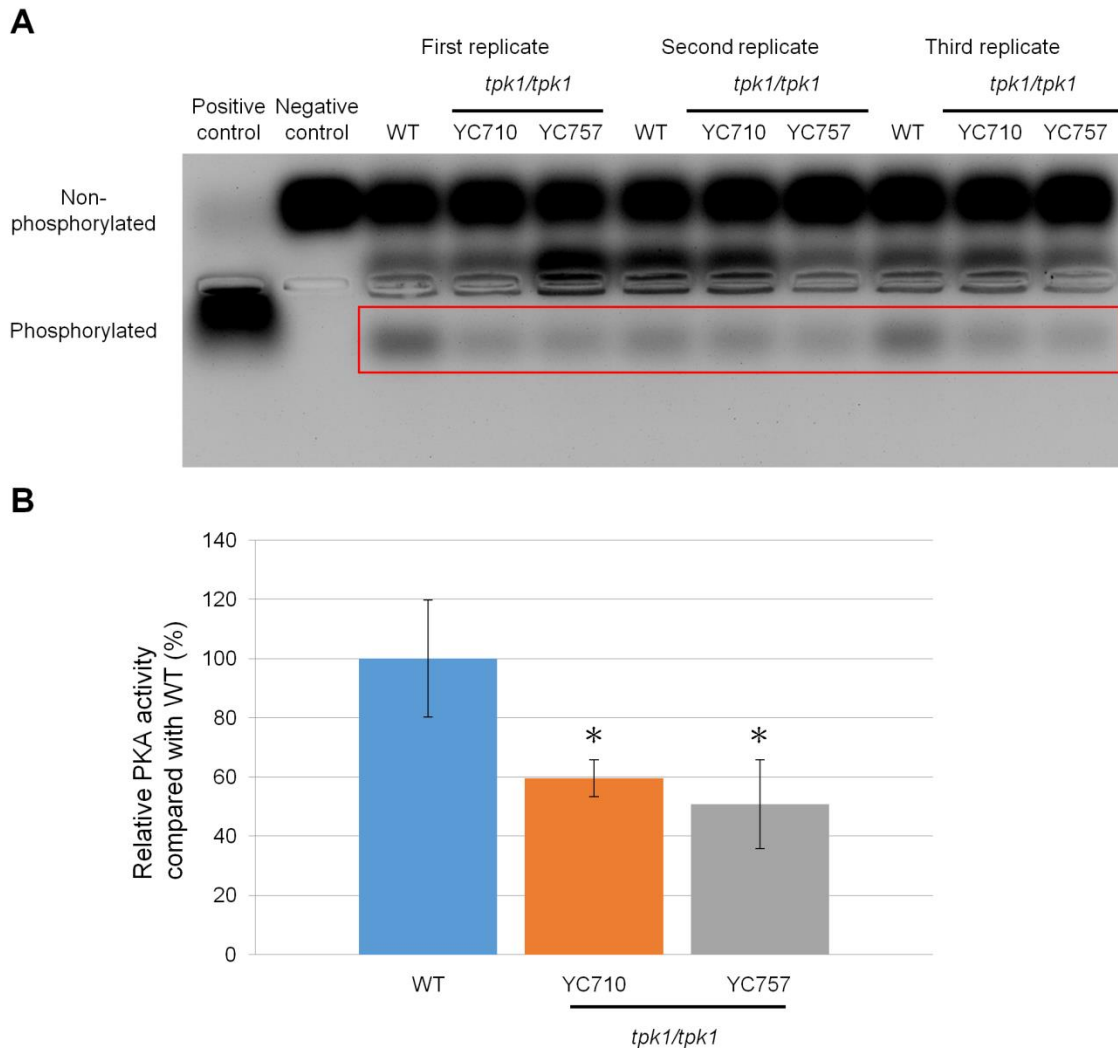

**Figure S2. Loss of *TPK1* results in lower PKA activity.**

(A) Protein kinase A activity of the indicated strains (red rectangles). Cells were grown overnight in YPD at 30°C and washed twice with dH<sub>2</sub>O. Crude protein extracts of the samples were isolated. PKA activity assays were carried out using the PepTag assay for non-radioactive detection of cAMP-dependent protein kinase kit. (B) Quantification of PKA activity in panel A (red rectangles) using Image J software. The experiments were performed in triplicate and the values indicate the mean ± standard deviation (SD). Asterisks indicate statistically significant differences compared with wild type using the T test ( $P < 0.05$ ).

Figure S3

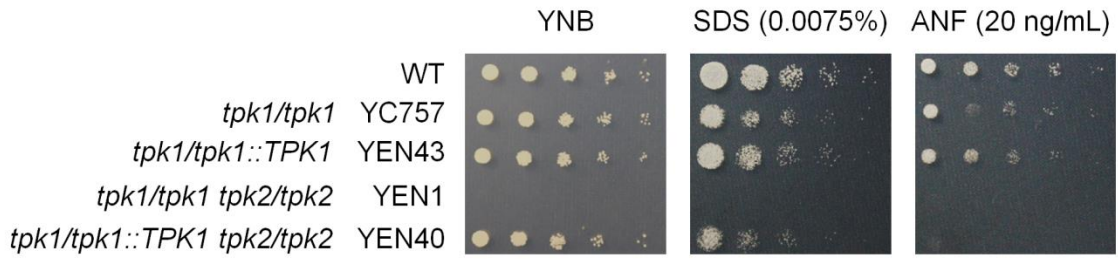

**Figure S3. Introducing *TPK1* in the *tpk1/tpk1* or *tpk1/tpk1 tpk2/tpk2* mutant restores stress responses.**

Growth of the indicated strains exposed to various stresses. Cells were grown overnight in YPD at 30°C (except the *tpk1/tpk1 tpk2/tpk2* mutant, which was grown for two days), washed twice with dH<sub>2</sub>O, and diluted to 0.2 OD<sub>600</sub>. Samples were five-fold serially diluted, spotted onto YNB medium containing the indicated chemicals, and incubated at 30°C for 24 h. ANF, anidulafungin; SDS, sodium dodecyl sulfate.

Figure S4

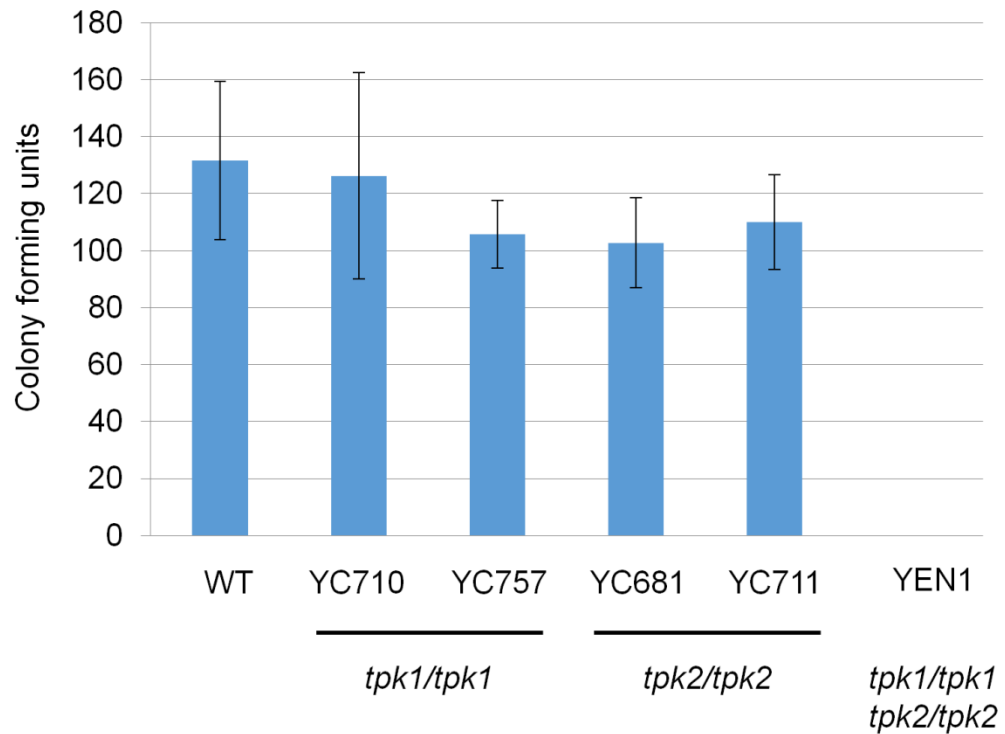

**Figure S4. Neither *TPK1* nor *TPK2* has effects on adherence to polystyrene.**

Adherence of the indicated strains on a 96-well plate. Cells were grown overnight in YPD at 30°C (except the *tpk1/tpk1 tpk2/tpk2* mutant, which was grown for two days), washed twice with PBS, and adjusted to 0.5 OD<sub>600</sub> in SC medium. Then, 200 µL of each strain was inoculated into 96-well polystyrene plates and incubated for 90 min at 37°C and 200 rpm. The wells were then washed twice with PBS to remove non-adhered cells. The adhered cells were vigorously resuspended in water and plated on YPD medium to determine the colony-forming units.

Figure S5

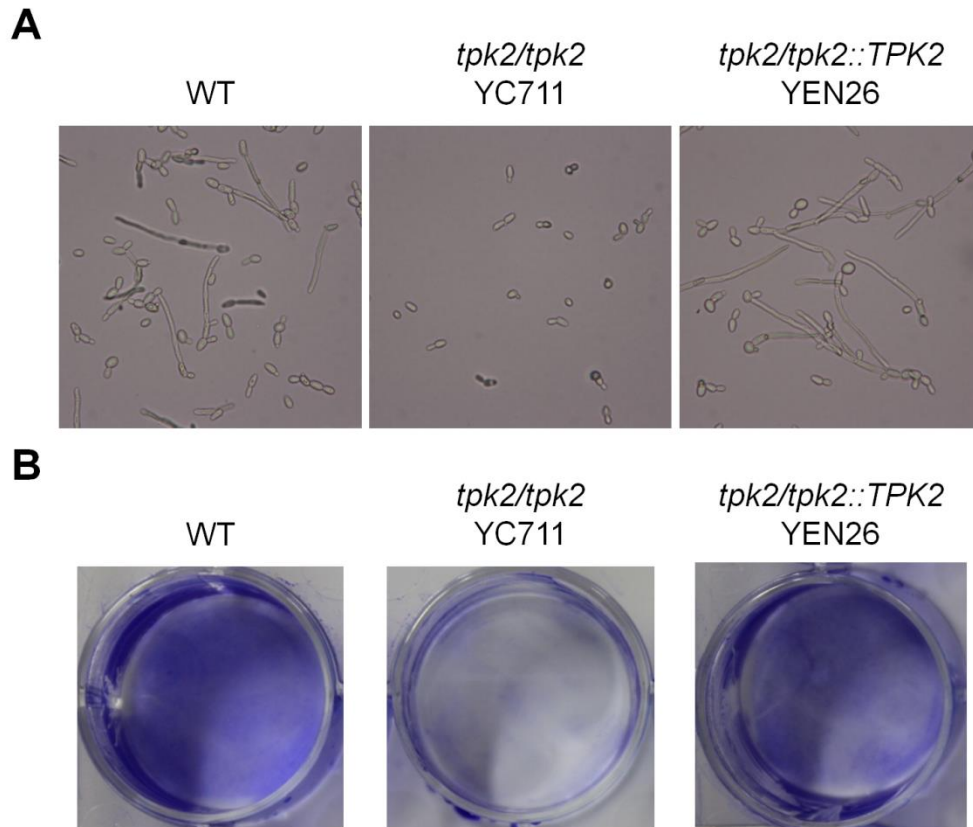

**Figure S5. *TPK2* complemented strain rescues hyphal growth and biofilm formation.**

(A) Hyphal growth of the indicated strains in SC medium with 10 mM GlcNAc. Cells were grown overnight in YPD at 30°C, washed twice with dH<sub>2</sub>O, diluted to 0.2 OD<sub>600</sub> with fresh SC medium with 10 mM of GlcNAc, and incubated at 37°C and 200 rpm for 4 h. (B) Cells were grown in YPD medium overnight at 30°C, washed twice with dH<sub>2</sub>O, and diluted to 0.5 OD<sub>600</sub> in SC medium. Afterwards, 2 mL of each sample were inoculated into a 12-well polystyrene plate for 90 min at 37°C and 200 rpm. The wells were then washed twice with PBS buffer, inoculated with 2 mL of fresh SC medium, and incubated for 24 h at 37°C and 200 rpm. The wells were washed twice with PBS, stained with 0.05% crystal violet, and photographed.

Figure S6

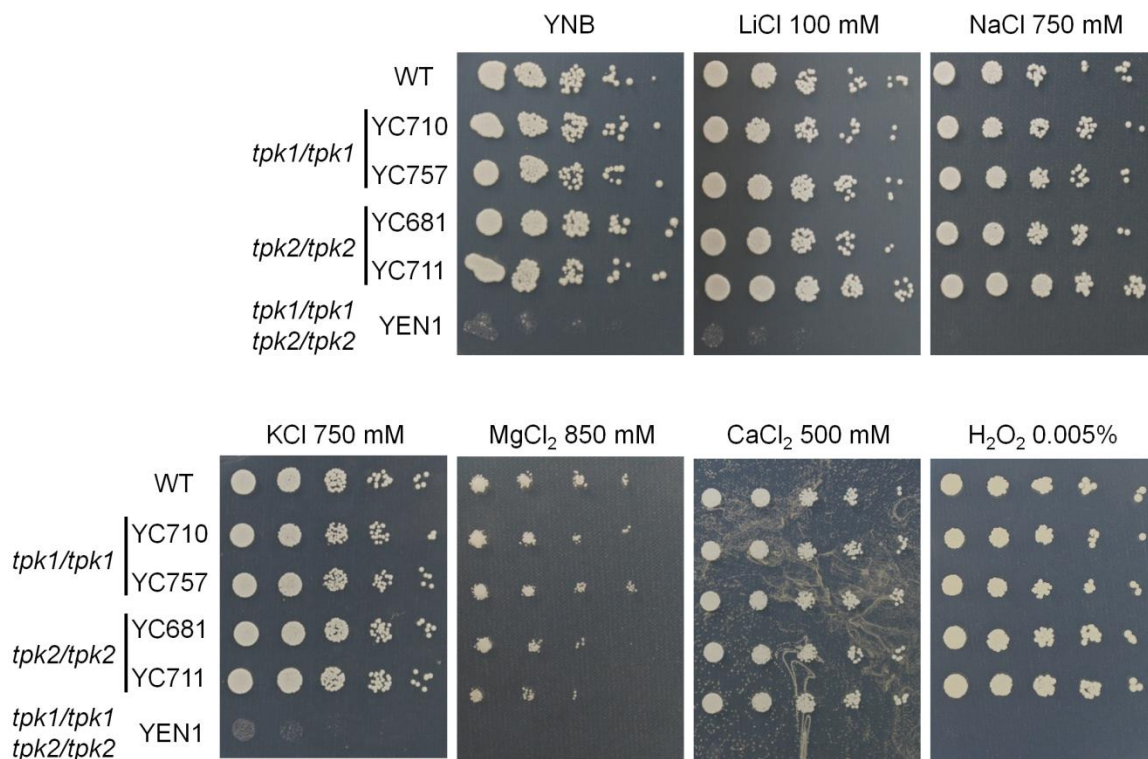

**Figure S6. *C. tropicalis* Tpk2 has a specific role in magnesium stress response.**

Growth of the indicated *C. tropicalis* strains exposed to various stresses (LiCl, NaCl, KCl, MgCl<sub>2</sub>, CaCl<sub>2</sub>, or H<sub>2</sub>O<sub>2</sub>). Cells were grown overnight in YPD at 30°C (except the *tpk1/tpk1 tpk2/tpk2* mutant, which was grown for two days) and washed twice with dH<sub>2</sub>O. Samples were five-fold serially diluted using 0.2 OD<sub>600</sub> as the initial concentration, spotted onto YNB medium containing the indicated chemicals, and incubated at 30°C for 48 h.
